ISBN 0-19-852989-9  
ISSN 0193-936X  
Printed in the USA

# epidemiologic reviews

GUN VIOLENCE: RISK, CONSEQUENCES, AND PREVENTION

[www.epirev.oxfordjournals.org](http://www.epirev.oxfordjournals.org)

volume 38 | 2016

Downloaded from <https://academic.oup.com/epirev/article/38/1/NP/2754870> by guest on 23 April 2024

OXFORD  OPEN

Published by Oxford University Press for the  
Johns Hopkins Bloomberg School of Public Health

OXFORD  
UNIVERSITY PRESS

epidemiologic reviews volume 38 | 2016

OXFORD
